# Supplementary material for: Candidate Chinese Herbal Medicine Alleviates Methamphetamine Addiction via Regulating Dopaminergic and Serotonergic Pathways
Source: Front Mol Neurosci. 2022 Mar 29;15:874080. doi: 10.3389/fnmol.2022.874080 (PMC9002015; doi:10.3389/fnmol.2022.874080)
Supplement: Supplementary file 2 [file Data_Sheet_2.XLSX]

## Sheet: Corydalis yanhusuo
MOL000217	(S)-Scoulerine	Alpha-2C adrenergic receptor	ADRA2C
MOL000217	(S)-Scoulerine	Alpha-1B adrenergic receptor	ADRA1B
MOL000217	(S)-Scoulerine	Alpha-2B adrenergic receptor	ADRA2B
MOL000217	(S)-Scoulerine	5-hydroxytryptamine 2C receptor	HTR2C
MOL000217	(S)-Scoulerine	D(3) dopamine receptor	DRD3
MOL000217	(S)-Scoulerine	Alpha-2A adrenergic receptor	ADRA2A
MOL000217	(S)-Scoulerine	Beta-2 adrenergic receptor	ADRB2
MOL000217	(S)-Scoulerine	Alpha-1D adrenergic receptor	ADRA1D
MOL000217	(S)-Scoulerine	Sodium channel protein type 5 subunit alpha	SCN5A
MOL000217	(S)-Scoulerine	Alpha-1A adrenergic receptor	ADRA1A
MOL000217	(S)-Scoulerine	Sodium-dependent dopamine transporter	SLC6A3
MOL000217	(S)-Scoulerine	Dopamine D1 receptor	DRD1
MOL000449	Stigmasterol	Beta-1 adrenergic receptor	ADRB1
MOL000449	Stigmasterol	Alpha-1B adrenergic receptor	ADRA1B
MOL000449	Stigmasterol	Amine oxidase [flavin-containing] B	MAOB
MOL000449	Stigmasterol	Alcohol dehydrogenase 1C	ADH1C
MOL000449	Stigmasterol	Amine oxidase [flavin-containing] A	MAOA
MOL000449	Stigmasterol	Alpha-2A adrenergic receptor	ADRA2A
MOL000449	Stigmasterol	Beta-2 adrenergic receptor	ADRB2
MOL000449	Stigmasterol	Sodium channel protein type 5 subunit alpha	SCN5A
MOL000449	Stigmasterol	Gamma-aminobutyric acid receptor subunit alpha-1	GABRA1
MOL000449	Stigmasterol	Alpha-1A adrenergic receptor	ADRA1A
MOL000449	Stigmasterol	Sodium-dependent dopamine transporter	SLC6A3
MOL000449	Stigmasterol	Neuronal acetylcholine receptor protein, alpha-7 chain	CHRNA7
MOL000785	palmatine	Nitric oxide synthase, inducible	NOS2
MOL000785	palmatine	Estrogen receptor	ESR1
MOL000785	palmatine	Beta-2 adrenergic receptor	ADRB2
MOL000785	palmatine	Sodium channel protein type 5 subunit alpha	SCN5A
MOL000787	Fumarine	Alpha-1B adrenergic receptor	ADRA1B
MOL000787	Fumarine	Beta-2 adrenergic receptor	ADRB2
MOL000787	Fumarine	Alpha-1D adrenergic receptor	ADRA1D
MOL000787	Fumarine	5-hydroxytryptamine receptor 3A	HTR3A
MOL000787	Fumarine	Voltage-dependent L-type calcium channel subunit alpha-1S	CACNA1S
MOL000787	Fumarine	Sodium channel protein type 5 subunit alpha	SCN5A
MOL000787	Fumarine	Sodium-dependent dopamine transporter	SLC6A3
MOL000787	Fumarine	Dopamine D1 receptor	DRD1
MOL000790	Isocorypalmine	Alpha-2C adrenergic receptor	ADRA2C
MOL000790	Isocorypalmine	Alpha-1B adrenergic receptor	ADRA1B
MOL000790	Isocorypalmine	Alpha-2B adrenergic receptor	ADRA2B
MOL000790	Isocorypalmine	5-hydroxytryptamine 2C receptor	HTR2C
MOL000790	Isocorypalmine	D(3) dopamine receptor	DRD3
MOL000790	Isocorypalmine	Beta-2 adrenergic receptor	ADRB2
MOL000790	Isocorypalmine	Alpha-1D adrenergic receptor	ADRA1D
MOL000790	Isocorypalmine	5-hydroxytryptamine receptor 3A	HTR3A
MOL000790	Isocorypalmine	Sodium channel protein type 5 subunit alpha	SCN5A
MOL000790	Isocorypalmine	Alpha-1A adrenergic receptor	ADRA1A
MOL000790	Isocorypalmine	Sodium-dependent dopamine transporter	SLC6A3
MOL000790	Isocorypalmine	Dopamine D1 receptor	DRD1
MOL000791	bicuculline	Gamma-aminobutyric acid type B receptor subunit 1	GABBR1
MOL000791	bicuculline	Bone morphogenetic protein receptor type-2	BMPR2
MOL000791	bicuculline	Thrombin	F2
MOL000791	bicuculline	Glutamate [NMDA] receptor subunit epsilon-4	GRIN2D
MOL000791	bicuculline	Metabotropic glutamate receptor 1	GRM1
MOL000791	bicuculline	Acetylcholinesterase	ACHE
MOL000791	bicuculline	Sodium channel protein type 5 subunit alpha	SCN5A
MOL000793	C09367	Alpha-1B adrenergic receptor	ADRA1B
MOL000793	C09367	Beta-2 adrenergic receptor	ADRB2
MOL000793	C09367	Alpha-1D adrenergic receptor	ADRA1D
MOL000793	C09367	Sodium channel protein type 5 subunit alpha	SCN5A
MOL001454	berberine	Nitric oxide synthase, inducible	NOS2
MOL001454	berberine	Estrogen receptor	ESR1
MOL001454	berberine	Beta-2 adrenergic receptor	ADRB2
MOL001454	berberine	Sodium channel protein type 5 subunit alpha	SCN5A
MOL001458	coptisine	Nitric oxide synthase, inducible	NOS2
MOL001458	coptisine	Estrogen receptor	ESR1
MOL001458	coptisine	Sodium channel protein type 5 subunit alpha	SCN5A
MOL001460	Cryptopin	Alpha-1B adrenergic receptor	ADRA1B
MOL001460	Cryptopin	Beta-2 adrenergic receptor	ADRB2
MOL001460	Cryptopin	Alpha-1D adrenergic receptor	ADRA1D
MOL001460	Cryptopin	5-hydroxytryptamine receptor 3A	HTR3A
MOL001460	Cryptopin	Voltage-dependent L-type calcium channel subunit alpha-1S	CACNA1S
MOL001460	Cryptopin	Sodium channel protein type 5 subunit alpha	SCN5A
MOL001460	Cryptopin	Dopamine D1 receptor	DRD1
MOL001461	Dihydrochelerythrine	Mitogen-activated protein kinase 14	MAPK14
MOL001461	Dihydrochelerythrine	Nitric oxide synthase, inducible	NOS2
MOL001461	Dihydrochelerythrine	Estrogen receptor	ESR1
MOL001461	Dihydrochelerythrine	Acetylcholinesterase	ACHE
MOL001461	Dihydrochelerythrine	Peroxisome proliferator activated receptor gamma	PPARG
MOL001461	Dihydrochelerythrine	Sodium channel protein type 5 subunit alpha	SCN5A
MOL001463	Dihydrosanguinarine	Mitogen-activated protein kinase 14	MAPK14
MOL001463	Dihydrosanguinarine	Nitric oxide synthase, inducible	NOS2
MOL001463	Dihydrosanguinarine	Estrogen receptor	ESR1
MOL001463	Dihydrosanguinarine	Acetylcholinesterase	ACHE
MOL001463	Dihydrosanguinarine	Peroxisome proliferator activated receptor gamma	PPARG
MOL002670	Cavidine	Alpha-2C adrenergic receptor	ADRA2C
MOL002670	Cavidine	Beta-1 adrenergic receptor	ADRB1
MOL002670	Cavidine	Alpha-1B adrenergic receptor	ADRA1B
MOL002670	Cavidine	5-hydroxytryptamine 2C receptor	HTR2C
MOL002670	Cavidine	Beta-2 adrenergic receptor	ADRB2
MOL002670	Cavidine	Alpha-1D adrenergic receptor	ADRA1D
MOL002670	Cavidine	5-hydroxytryptamine receptor 3A	HTR3A
MOL002670	Cavidine	Sodium channel protein type 5 subunit alpha	SCN5A
MOL002670	Cavidine	Dopamine D1 receptor	DRD1
MOL002903	(R)-Canadine	Alpha-2C adrenergic receptor	ADRA2C
MOL002903	(R)-Canadine	Alpha-1B adrenergic receptor	ADRA1B
MOL002903	(R)-Canadine	5-hydroxytryptamine 2C receptor	HTR2C
MOL002903	(R)-Canadine	Beta-2 adrenergic receptor	ADRB2
MOL002903	(R)-Canadine	Alpha-1D adrenergic receptor	ADRA1D
MOL002903	(R)-Canadine	5-hydroxytryptamine receptor 3A	HTR3A
MOL002903	(R)-Canadine	Sodium channel protein type 5 subunit alpha	SCN5A
MOL002903	(R)-Canadine	Alpha-1A adrenergic receptor	ADRA1A
MOL002903	(R)-Canadine	Sodium-dependent dopamine transporter	SLC6A3
MOL002903	(R)-Canadine	Dopamine D1 receptor	DRD1
MOL004071	Hyndarin	Alpha-2C adrenergic receptor	ADRA2C
MOL004071	Hyndarin	Beta-1 adrenergic receptor	ADRB1
MOL004071	Hyndarin	D(2) dopamine receptor	DRD2
MOL004071	Hyndarin	Alpha-1B adrenergic receptor	ADRA1B
MOL004071	Hyndarin	5-hydroxytryptamine 2C receptor	HTR2C
MOL004071	Hyndarin	D(3) dopamine receptor	DRD3
MOL004071	Hyndarin	Beta-2 adrenergic receptor	ADRB2
MOL004071	Hyndarin	Alpha-1D adrenergic receptor	ADRA1D
MOL004071	Hyndarin	5-hydroxytryptamine receptor 3A	HTR3A
MOL004071	Hyndarin	Sodium channel protein type 5 subunit alpha	SCN5A
MOL004071	Hyndarin	Sodium-dependent dopamine transporter	SLC6A3
MOL004071	Hyndarin	Dopamine D1 receptor	DRD1
MOL004190	(-)-alpha-N-methylcanadine	Beta-2 adrenergic receptor	ADRB2
MOL004190	(-)-alpha-N-methylcanadine	Alpha-1D adrenergic receptor	ADRA1D
MOL004190	(-)-alpha-N-methylcanadine	Sodium channel protein type 5 subunit alpha	SCN5A
MOL004191	Capaurine	Alpha-1B adrenergic receptor	ADRA1B
MOL004191	Capaurine	5-hydroxytryptamine 2C receptor	HTR2C
MOL004191	Capaurine	Beta-2 adrenergic receptor	ADRB2
MOL004191	Capaurine	Alpha-1D adrenergic receptor	ADRA1D
MOL004191	Capaurine	Sodium channel protein type 5 subunit alpha	SCN5A
MOL004191	Capaurine	Sodium-dependent dopamine transporter	SLC6A3
MOL004191	Capaurine	Dopamine D1 receptor	DRD1
MOL004193	Clarkeanidine	Alpha-2C adrenergic receptor	ADRA2C
MOL004193	Clarkeanidine	Alpha-1B adrenergic receptor	ADRA1B
MOL004193	Clarkeanidine	Alpha-2B adrenergic receptor	ADRA2B
MOL004193	Clarkeanidine	5-hydroxytryptamine 2C receptor	HTR2C
MOL004193	Clarkeanidine	Beta-2 adrenergic receptor	ADRB2
MOL004193	Clarkeanidine	Alpha-1D adrenergic receptor	ADRA1D
MOL004193	Clarkeanidine	Sodium channel protein type 5 subunit alpha	SCN5A
MOL004193	Clarkeanidine	Alpha-1A adrenergic receptor	ADRA1A
MOL004193	Clarkeanidine	Sodium-dependent dopamine transporter	SLC6A3
MOL004193	Clarkeanidine	Dopamine D1 receptor	DRD1
MOL004195	CORYDALINE	D(2) dopamine receptor	DRD2
MOL004195	CORYDALINE	Alpha-1B adrenergic receptor	ADRA1B
MOL004195	CORYDALINE	Alpha-2B adrenergic receptor	ADRA2B
MOL004195	CORYDALINE	5-hydroxytryptamine 2C receptor	HTR2C
MOL004195	CORYDALINE	Beta-2 adrenergic receptor	ADRB2
MOL004195	CORYDALINE	Alpha-1D adrenergic receptor	ADRA1D
MOL004195	CORYDALINE	Sodium channel protein type 5 subunit alpha	SCN5A
MOL004195	CORYDALINE	Sodium-dependent dopamine transporter	SLC6A3
MOL004195	CORYDALINE	Dopamine D1 receptor	DRD1
MOL004196	Corydalmine	Alpha-2C adrenergic receptor	ADRA2C
MOL004196	Corydalmine	Alpha-1B adrenergic receptor	ADRA1B
MOL004196	Corydalmine	Estrogen receptor	ESR1
MOL004196	Corydalmine	Beta-2 adrenergic receptor	ADRB2
MOL004196	Corydalmine	Alpha-1D adrenergic receptor	ADRA1D
MOL004196	Corydalmine	Acetylcholinesterase	ACHE
MOL004196	Corydalmine	Peroxisome proliferator activated receptor gamma	PPARG
MOL004196	Corydalmine	Sodium channel protein type 5 subunit alpha	SCN5A
MOL004197	Corydine	Alpha-1B adrenergic receptor	ADRA1B
MOL004197	Corydine	Beta-2 adrenergic receptor	ADRB2
MOL004197	Corydine	Alpha-1D adrenergic receptor	ADRA1D
MOL004197	Corydine	Acetylcholinesterase	ACHE
MOL004197	Corydine	Sodium channel protein type 5 subunit alpha	SCN5A
MOL004198	18797-79-0	Alpha-1B adrenergic receptor	ADRA1B
MOL004198	18797-79-0	Sodium channel protein type 5 subunit alpha	SCN5A
MOL004199	Corynoloxine	Acetylcholinesterase	ACHE
MOL004199	Corynoloxine	Sodium channel protein type 5 subunit alpha	SCN5A
MOL004200	methyl-[2-(3,4,6,7-tetramethoxy-1-phenanthryl)ethyl]amine	Sodium channel protein type 5 subunit alpha	SCN5A
MOL004202	dehydrocavidine	Alpha-1B adrenergic receptor	ADRA1B
MOL004202	dehydrocavidine	5-hydroxytryptamine 2C receptor	HTR2C
MOL004202	dehydrocavidine	Beta-2 adrenergic receptor	ADRB2
MOL004202	dehydrocavidine	Alpha-1D adrenergic receptor	ADRA1D
MOL004202	dehydrocavidine	Sodium channel protein type 5 subunit alpha	SCN5A
MOL004202	dehydrocavidine	Dopamine D1 receptor	DRD1
MOL004203	Dehydrocorybulbine	Mitogen-activated protein kinase 14	MAPK14
MOL004203	Dehydrocorybulbine	Nitric oxide synthase, inducible	NOS2
MOL004203	Dehydrocorybulbine	Estrogen receptor	ESR1
MOL004203	Dehydrocorybulbine	Sodium channel protein type 5 subunit alpha	SCN5A
MOL004204	dehydrocorydaline	Mitogen-activated protein kinase 14	MAPK14
MOL004204	dehydrocorydaline	Nitric oxide synthase, inducible	NOS2
MOL004204	dehydrocorydaline	Estrogen receptor	ESR1
MOL004204	dehydrocorydaline	Sodium channel protein type 5 subunit alpha	SCN5A
MOL004205	Dehydrocorydalmine	Nitric oxide synthase, inducible	NOS2
MOL004205	Dehydrocorydalmine	Estrogen receptor	ESR1
MOL004205	Dehydrocorydalmine	Beta-2 adrenergic receptor	ADRB2
MOL004205	Dehydrocorydalmine	Sodium channel protein type 5 subunit alpha	SCN5A
MOL004208	demethylcorydalmatine	Alpha-2C adrenergic receptor	ADRA2C
MOL004208	demethylcorydalmatine	Alpha-1B adrenergic receptor	ADRA1B
MOL004208	demethylcorydalmatine	Beta-2 adrenergic receptor	ADRB2
MOL004208	demethylcorydalmatine	Alpha-1D adrenergic receptor	ADRA1D
MOL004208	demethylcorydalmatine	Sodium channel protein type 5 subunit alpha	SCN5A
MOL004208	demethylcorydalmatine	Sodium-dependent dopamine transporter	SLC6A3
MOL004208	demethylcorydalmatine	Dopamine D1 receptor	DRD1
MOL004209	13-methyldehydrocorydalmine	Mitogen-activated protein kinase 14	MAPK14
MOL004209	13-methyldehydrocorydalmine	Nitric oxide synthase, inducible	NOS2
MOL004209	13-methyldehydrocorydalmine	Estrogen receptor	ESR1
MOL004210	(1S,8'R)-6,7-dimethoxy-2-methylspiro[3,4-dihydroisoquinoline-1,7'-6,8-dihydrocyclopenta[g][1,3]benzodioxole]-8'-ol	Alpha-1B adrenergic receptor	ADRA1B
MOL004210	(1S,8'R)-6,7-dimethoxy-2-methylspiro[3,4-dihydroisoquinoline-1,7'-6,8-dihydrocyclopenta[g][1,3]benzodioxole]-8'-ol	Alpha-1D adrenergic receptor	ADRA1D
MOL004210	(1S,8'R)-6,7-dimethoxy-2-methylspiro[3,4-dihydroisoquinoline-1,7'-6,8-dihydrocyclopenta[g][1,3]benzodioxole]-8'-ol	Sodium channel protein type 5 subunit alpha	SCN5A
MOL004214	isocorybulbine	Alpha-1B adrenergic receptor	ADRA1B
MOL004214	isocorybulbine	Estrogen receptor	ESR1
MOL004214	isocorybulbine	Beta-2 adrenergic receptor	ADRB2
MOL004214	isocorybulbine	Alpha-1D adrenergic receptor	ADRA1D
MOL004214	isocorybulbine	Acetylcholinesterase	ACHE
MOL004214	isocorybulbine	Sodium channel protein type 5 subunit alpha	SCN5A
MOL004215	leonticine	Alpha-2C adrenergic receptor	ADRA2C
MOL004215	leonticine	Beta-1 adrenergic receptor	ADRB1
MOL004215	leonticine	D(2) dopamine receptor	DRD2
MOL004215	leonticine	Alpha-1B adrenergic receptor	ADRA1B
MOL004215	leonticine	Alpha-2B adrenergic receptor	ADRA2B
MOL004215	leonticine	5-hydroxytryptamine 2C receptor	HTR2C
MOL004215	leonticine	Alpha-2A adrenergic receptor	ADRA2A
MOL004215	leonticine	Beta-2 adrenergic receptor	ADRB2
MOL004215	leonticine	Alpha-1D adrenergic receptor	ADRA1D
MOL004215	leonticine	Sodium channel protein type 5 subunit alpha	SCN5A
MOL004215	leonticine	Gamma-aminobutyric acid receptor subunit alpha-1	GABRA1
MOL004215	leonticine	Alpha-1A adrenergic receptor	ADRA1A
MOL004215	leonticine	Sodium-dependent dopamine transporter	SLC6A3
MOL004215	leonticine	Dopamine D1 receptor	DRD1
MOL004216	13-methylpalmatrubine	Mitogen-activated protein kinase 14	MAPK14
MOL004216	13-methylpalmatrubine	Nitric oxide synthase, inducible	NOS2
MOL004216	13-methylpalmatrubine	Estrogen receptor	ESR1
MOL004216	13-methylpalmatrubine	Sodium channel protein type 5 subunit alpha	SCN5A
MOL004220	N-methyllaurotetanine	Alpha-1B adrenergic receptor	ADRA1B
MOL004220	N-methyllaurotetanine	Beta-2 adrenergic receptor	ADRB2
MOL004220	N-methyllaurotetanine	Alpha-1D adrenergic receptor	ADRA1D
MOL004220	N-methyllaurotetanine	Sodium channel protein type 5 subunit alpha	SCN5A
MOL004221	norglaucing	Alpha-1B adrenergic receptor	ADRA1B
MOL004221	norglaucing	Beta-2 adrenergic receptor	ADRB2
MOL004221	norglaucing	Alpha-1D adrenergic receptor	ADRA1D
MOL004221	norglaucing	Acetylcholinesterase	ACHE
MOL004221	norglaucing	Sodium channel protein type 5 subunit alpha	SCN5A
MOL004225	pseudocoptisine	Nitric oxide synthase, inducible	NOS2
MOL004225	pseudocoptisine	Estrogen receptor	ESR1
MOL004226	24240-05-9	Alpha-1B adrenergic receptor	ADRA1B
MOL004226	24240-05-9	Alpha-1D adrenergic receptor	ADRA1D
MOL004226	24240-05-9	5-hydroxytryptamine receptor 3A	HTR3A
MOL004226	24240-05-9	Sodium channel protein type 5 subunit alpha	SCN5A
MOL004228	saulatine	Alpha-1B adrenergic receptor	ADRA1B
MOL004228	saulatine	Sodium channel protein type 5 subunit alpha	SCN5A
MOL004230	stylopine	Alpha-1B adrenergic receptor	ADRA1B
MOL004230	stylopine	Beta-2 adrenergic receptor	ADRB2
MOL004230	stylopine	Alpha-1D adrenergic receptor	ADRA1D
MOL004230	stylopine	5-hydroxytryptamine receptor 3A	HTR3A
MOL004230	stylopine	Sodium channel protein type 5 subunit alpha	SCN5A
MOL004230	stylopine	Sodium-dependent dopamine transporter	SLC6A3
MOL004231	Tetrahydrocorysamine	Alpha-1B adrenergic receptor	ADRA1B
MOL004231	Tetrahydrocorysamine	Beta-2 adrenergic receptor	ADRB2
MOL004231	Tetrahydrocorysamine	Alpha-1D adrenergic receptor	ADRA1D
MOL004231	Tetrahydrocorysamine	Sodium channel protein type 5 subunit alpha	SCN5A
MOL004232	tetrahydroprotopapaverine	Alpha-2C adrenergic receptor	ADRA2C
MOL004232	tetrahydroprotopapaverine	Beta-1 adrenergic receptor	ADRB1
MOL004232	tetrahydroprotopapaverine	Alpha-1B adrenergic receptor	ADRA1B
MOL004232	tetrahydroprotopapaverine	5-hydroxytryptamine 2C receptor	HTR2C
MOL004232	tetrahydroprotopapaverine	Beta-2 adrenergic receptor	ADRB2
MOL004232	tetrahydroprotopapaverine	Alpha-1D adrenergic receptor	ADRA1D
MOL004232	tetrahydroprotopapaverine	Sodium channel protein type 5 subunit alpha	SCN5A
MOL004232	tetrahydroprotopapaverine	Sodium-dependent dopamine transporter	SLC6A3
MOL004232	tetrahydroprotopapaverine	Dopamine D1 receptor	DRD1
MOL004233	ST057701	Alpha-1B adrenergic receptor	ADRA1B
MOL004233	ST057701	5-hydroxytryptamine 2C receptor	HTR2C
MOL004233	ST057701	Beta-2 adrenergic receptor	ADRB2
MOL004233	ST057701	Alpha-1D adrenergic receptor	ADRA1D
MOL004233	ST057701	Sodium channel protein type 5 subunit alpha	SCN5A
MOL004233	ST057701	Sodium-dependent dopamine transporter	SLC6A3
MOL004234	2,3,9,10-tetramethoxy-13-methyl-5,6-dihydroisoquinolino[2,1-b]isoquinolin-8-one	Nitric oxide synthase, inducible	NOS2
MOL004234	2,3,9,10-tetramethoxy-13-methyl-5,6-dihydroisoquinolino[2,1-b]isoquinolin-8-one	Sodium channel protein type 5 subunit alpha	SCN5A
MOL004763	Izoteolin	Alpha-1B adrenergic receptor	ADRA1B
MOL004763	Izoteolin	Beta-2 adrenergic receptor	ADRB2
MOL004763	Izoteolin	Alpha-1D adrenergic receptor	ADRA1D
MOL004763	Izoteolin	Acetylcholinesterase	ACHE
MOL004763	Izoteolin	Sodium channel protein type 5 subunit alpha	SCN5A
MOL004763	Izoteolin	Alpha-1A adrenergic receptor	ADRA1A
MOL004763	Izoteolin	Sodium-dependent dopamine transporter	SLC6A3

## Sheet: Poria cocos
MOL000296	hederagenin	Alcohol dehydrogenase 1B	ADH1B
MOL000296	hederagenin	Alpha-1B adrenergic receptor	ADRA1B
MOL000296	hederagenin	Alcohol dehydrogenase 1C	ADH1C
MOL000296	hederagenin	Gamma-aminobutyric-acid receptor alpha-2 subunit	GABRA2
MOL000296	hederagenin	Gamma-aminobutyric-acid receptor subunit alpha-6	GABRA6
MOL000296	hederagenin	Sodium channel protein type 5 subunit alpha	SCN5A
MOL000296	hederagenin	Gamma-aminobutyric acid receptor subunit alpha-1	GABRA1

## Sheet: Licorice
MOL000239	Jaranol	Nitric oxide synthase, inducible	NOS2
MOL000239	Jaranol	Sodium channel protein type 5 subunit alpha	SCN5A
MOL000378	7-O-methylisomucronulatol	Glycogen synthase kinase-3 beta	GSK3B
MOL000392	formononetin	Mitogen-activated protein kinase 14	MAPK14
MOL000392	formononetin	Nitric oxide synthase, inducible	NOS2
MOL000392	formononetin	Amine oxidase [flavin-containing] B	MAOB
MOL000392	formononetin	Thrombin	F2
MOL000392	formononetin	NAD-dependent deacetylase sirtuin-1	SIRT1
MOL000392	formononetin	Estrogen receptor	ESR1
MOL000392	formononetin	Beta-2 adrenergic receptor	ADRB2
MOL000392	formononetin	Transcription factor AP-1	JUN
MOL000392	formononetin	Acetylcholinesterase	ACHE
MOL000392	formononetin	Glycogen synthase kinase-3 beta	GSK3B
MOL000392	formononetin	Peroxisome proliferator activated receptor gamma	PPARG
MOL000392	formononetin	Peroxisome proliferator-activated receptor gamma	PPARG
MOL000392	formononetin	Alpha-1A adrenergic receptor	ADRA1A
MOL000392	formononetin	Sodium-dependent dopamine transporter	SLC6A3
MOL000497	licochalcone a	Mitogen-activated protein kinase 14	MAPK14
MOL000497	licochalcone a	Nitric oxide synthase, inducible	NOS2
MOL000497	licochalcone a	Alpha-1B adrenergic receptor	ADRA1B
MOL000497	licochalcone a	Estrogen receptor	ESR1
MOL000497	licochalcone a	Beta-2 adrenergic receptor	ADRB2
MOL000497	licochalcone a	Glycogen synthase kinase-3 beta	GSK3B
MOL000497	licochalcone a	Peroxisome proliferator activated receptor gamma	PPARG
MOL000497	licochalcone a	Sodium channel protein type 5 subunit alpha	SCN5A
MOL000497	licochalcone a	Sodium-dependent dopamine transporter	SLC6A3
MOL000500	Vestitol	Mitogen-activated protein kinase 14	MAPK14
MOL000500	Vestitol	Nitric oxide synthase, inducible	NOS2
MOL000500	Vestitol	Alpha-1B adrenergic receptor	ADRA1B
MOL000500	Vestitol	Estrogen receptor	ESR1
MOL000500	Vestitol	Beta-2 adrenergic receptor	ADRB2
MOL000500	Vestitol	Glycogen synthase kinase-3 beta	GSK3B
MOL000500	Vestitol	Peroxisome proliferator activated receptor gamma	PPARG
MOL000500	Vestitol	Sodium channel protein type 5 subunit alpha	SCN5A
MOL000500	Vestitol	Alpha-1A adrenergic receptor	ADRA1A
MOL000500	Vestitol	Sodium-dependent dopamine transporter	SLC6A3
MOL001484	Inermine	Alpha-1B adrenergic receptor	ADRA1B
MOL001484	Inermine	Phosphatidylinositol-4,5-bisphosphate 3-kinase catalytic subunit, gamma isoform	PIK3CG
MOL001484	Inermine	Beta-2 adrenergic receptor	ADRB2
MOL001484	Inermine	Alpha-1D adrenergic receptor	ADRA1D
MOL001484	Inermine	5-hydroxytryptamine receptor 3A	HTR3A
MOL001484	Inermine	Sodium channel protein type 5 subunit alpha	SCN5A
MOL001792	DFV	Amine oxidase [flavin-containing] B	MAOB
MOL001792	DFV	Phosphatidylinositol-4,5-bisphosphate 3-kinase catalytic subunit, gamma isoform	PIK3CG
MOL001792	DFV	Estrogen receptor	ESR1
MOL001792	DFV	Beta-2 adrenergic receptor	ADRB2
MOL002311	Glycyrol	Mitogen-activated protein kinase 14	MAPK14
MOL002311	Glycyrol	Nitric oxide synthase, inducible	NOS2
MOL002311	Glycyrol	Thrombin	F2
MOL002311	Glycyrol	Estrogen receptor	ESR1
MOL002311	Glycyrol	Glycogen synthase kinase-3 beta	GSK3B
MOL002311	Glycyrol	Peroxisome proliferator activated receptor gamma	PPARG
MOL002565	Medicarpin	Nitric oxide synthase, inducible	NOS2
MOL002565	Medicarpin	Alpha-1B adrenergic receptor	ADRA1B
MOL002565	Medicarpin	Phosphatidylinositol-4,5-bisphosphate 3-kinase catalytic subunit, gamma isoform	PIK3CG
MOL002565	Medicarpin	Estrogen receptor	ESR1
MOL002565	Medicarpin	Beta-2 adrenergic receptor	ADRB2
MOL002565	Medicarpin	Alpha-1D adrenergic receptor	ADRA1D
MOL002565	Medicarpin	Mitogen-activated protein kinase 10	MAPK10
MOL002565	Medicarpin	Sodium channel protein type 5 subunit alpha	SCN5A
MOL002565	Medicarpin	Alpha-1A adrenergic receptor	ADRA1A
MOL002565	Medicarpin	Sodium-dependent dopamine transporter	SLC6A3
MOL002565	Medicarpin	Neuronal acetylcholine receptor protein, alpha-7 chain	CHRNA7
MOL002565	Medicarpin	Dopamine D1 receptor	DRD1
MOL003656	Lupiwighteone	Mitogen-activated protein kinase 14	MAPK14
MOL003656	Lupiwighteone	Nitric oxide synthase, inducible	NOS2
MOL003656	Lupiwighteone	Thrombin	F2
MOL003656	Lupiwighteone	Estrogen receptor	ESR1
MOL003656	Lupiwighteone	Glycogen synthase kinase-3 beta	GSK3B
MOL003656	Lupiwighteone	Peroxisome proliferator activated receptor gamma	PPARG
MOL003656	Lupiwighteone	Sodium channel protein type 5 subunit alpha	SCN5A
MOL003896	7-Methoxy-2-methyl isoflavone	Mitogen-activated protein kinase 14	MAPK14
MOL003896	7-Methoxy-2-methyl isoflavone	Beta-1 adrenergic receptor	ADRB1
MOL003896	7-Methoxy-2-methyl isoflavone	Nitric oxide synthase, inducible	NOS2
MOL003896	7-Methoxy-2-methyl isoflavone	Alpha-1B adrenergic receptor	ADRA1B
MOL003896	7-Methoxy-2-methyl isoflavone	Amine oxidase [flavin-containing] B	MAOB
MOL003896	7-Methoxy-2-methyl isoflavone	Thrombin	F2
MOL003896	7-Methoxy-2-methyl isoflavone	Estrogen receptor	ESR1
MOL003896	7-Methoxy-2-methyl isoflavone	Beta-2 adrenergic receptor	ADRB2
MOL003896	7-Methoxy-2-methyl isoflavone	Alpha-1D adrenergic receptor	ADRA1D
MOL003896	7-Methoxy-2-methyl isoflavone	Acetylcholinesterase	ACHE
MOL003896	7-Methoxy-2-methyl isoflavone	Glycogen synthase kinase-3 beta	GSK3B
MOL003896	7-Methoxy-2-methyl isoflavone	Peroxisome proliferator activated receptor gamma	PPARG
MOL003896	7-Methoxy-2-methyl isoflavone	Sodium channel protein type 5 subunit alpha	SCN5A
MOL003896	7-Methoxy-2-methyl isoflavone	Gamma-aminobutyric acid receptor subunit alpha-1	GABRA1
MOL003896	7-Methoxy-2-methyl isoflavone	Sodium-dependent dopamine transporter	SLC6A3
MOL003896	7-Methoxy-2-methyl isoflavone	Neuronal acetylcholine receptor protein, alpha-7 chain	CHRNA7
MOL003896	7-Methoxy-2-methyl isoflavone	Dopamine D1 receptor	DRD1
MOL004805	(2S)-2-[4-hydroxy-3-(3-methylbut-2-enyl)phenyl]-8,8-dimethyl-2,3-dihydropyrano[2,3-f]chromen-4-one	Mitogen-activated protein kinase 14	MAPK14
MOL004805	(2S)-2-[4-hydroxy-3-(3-methylbut-2-enyl)phenyl]-8,8-dimethyl-2,3-dihydropyrano[2,3-f]chromen-4-one	Nitric oxide synthase, inducible	NOS2
MOL004805	(2S)-2-[4-hydroxy-3-(3-methylbut-2-enyl)phenyl]-8,8-dimethyl-2,3-dihydropyrano[2,3-f]chromen-4-one	Estrogen receptor	ESR1
MOL004805	(2S)-2-[4-hydroxy-3-(3-methylbut-2-enyl)phenyl]-8,8-dimethyl-2,3-dihydropyrano[2,3-f]chromen-4-one	Glycogen synthase kinase-3 beta	GSK3B
MOL004805	(2S)-2-[4-hydroxy-3-(3-methylbut-2-enyl)phenyl]-8,8-dimethyl-2,3-dihydropyrano[2,3-f]chromen-4-one	Peroxisome proliferator activated receptor gamma	PPARG
MOL004806	euchrenone	Nitric oxide synthase, inducible	NOS2
MOL004806	euchrenone	Estrogen receptor	ESR1
MOL004806	euchrenone	Sodium channel protein type 5 subunit alpha	SCN5A
MOL004808	glyasperin B	Nitric oxide synthase, inducible	NOS2
MOL004808	glyasperin B	Thrombin	F2
MOL004808	glyasperin B	Estrogen receptor	ESR1
MOL004808	glyasperin B	Acetylcholinesterase	ACHE
MOL004808	glyasperin B	Glycogen synthase kinase-3 beta	GSK3B
MOL004808	glyasperin B	Peroxisome proliferator activated receptor gamma	PPARG
MOL004810	glyasperin F	Mitogen-activated protein kinase 14	MAPK14
MOL004810	glyasperin F	Nitric oxide synthase, inducible	NOS2
MOL004810	glyasperin F	Estrogen receptor	ESR1
MOL004810	glyasperin F	Glycogen synthase kinase-3 beta	GSK3B
MOL004810	glyasperin F	Peroxisome proliferator activated receptor gamma	PPARG
MOL004810	glyasperin F	Sodium channel protein type 5 subunit alpha	SCN5A
MOL004811	Glyasperin C	Mitogen-activated protein kinase 14	MAPK14
MOL004811	Glyasperin C	Nitric oxide synthase, inducible	NOS2
MOL004811	Glyasperin C	Thrombin	F2
MOL004811	Glyasperin C	Estrogen receptor	ESR1
MOL004811	Glyasperin C	Acetylcholinesterase	ACHE
MOL004811	Glyasperin C	Glycogen synthase kinase-3 beta	GSK3B
MOL004811	Glyasperin C	Peroxisome proliferator activated receptor gamma	PPARG
MOL004811	Glyasperin C	Sodium channel protein type 5 subunit alpha	SCN5A
MOL004814	Isotrifoliol	Mitogen-activated protein kinase 14	MAPK14
MOL004814	Isotrifoliol	Nitric oxide synthase, inducible	NOS2
MOL004814	Isotrifoliol	Phosphatidylinositol-4,5-bisphosphate 3-kinase catalytic subunit, gamma isoform	PIK3CG
MOL004814	Isotrifoliol	Estrogen receptor	ESR1
MOL004814	Isotrifoliol	Glycogen synthase kinase-3 beta	GSK3B
MOL004815	(E)-1-(2,4-dihydroxyphenyl)-3-(2,2-dimethylchromen-6-yl)prop-2-en-1-one	Mitogen-activated protein kinase 14	MAPK14
MOL004815	(E)-1-(2,4-dihydroxyphenyl)-3-(2,2-dimethylchromen-6-yl)prop-2-en-1-one	Nitric oxide synthase, inducible	NOS2
MOL004815	(E)-1-(2,4-dihydroxyphenyl)-3-(2,2-dimethylchromen-6-yl)prop-2-en-1-one	Alpha-1B adrenergic receptor	ADRA1B
MOL004815	(E)-1-(2,4-dihydroxyphenyl)-3-(2,2-dimethylchromen-6-yl)prop-2-en-1-one	Estrogen receptor	ESR1
MOL004815	(E)-1-(2,4-dihydroxyphenyl)-3-(2,2-dimethylchromen-6-yl)prop-2-en-1-one	Estrogen receptor	ESR1
MOL004815	(E)-1-(2,4-dihydroxyphenyl)-3-(2,2-dimethylchromen-6-yl)prop-2-en-1-one	Glycogen synthase kinase-3 beta	GSK3B
MOL004815	(E)-1-(2,4-dihydroxyphenyl)-3-(2,2-dimethylchromen-6-yl)prop-2-en-1-one	Peroxisome proliferator activated receptor gamma	PPARG
MOL004815	(E)-1-(2,4-dihydroxyphenyl)-3-(2,2-dimethylchromen-6-yl)prop-2-en-1-one	Sodium channel protein type 5 subunit alpha	SCN5A
MOL004820	kanzonols W	Mitogen-activated protein kinase 14	MAPK14
MOL004820	kanzonols W	Nitric oxide synthase, inducible	NOS2
MOL004820	kanzonols W	Estrogen receptor	ESR1
MOL004820	kanzonols W	Glycogen synthase kinase-3 beta	GSK3B
MOL004820	kanzonols W	Peroxisome proliferator activated receptor gamma	PPARG
MOL004820	kanzonols W	Sodium channel protein type 5 subunit alpha	SCN5A
MOL004828	Glepidotin A	Mitogen-activated protein kinase 14	MAPK14
MOL004828	Glepidotin A	Nitric oxide synthase, inducible	NOS2
MOL004828	Glepidotin A	Thrombin	F2
MOL004828	Glepidotin A	Estrogen receptor	ESR1
MOL004828	Glepidotin A	Glycogen synthase kinase-3 beta	GSK3B
MOL004828	Glepidotin A	Peroxisome proliferator activated receptor gamma	PPARG
MOL004828	Glepidotin A	Sodium channel protein type 5 subunit alpha	SCN5A
MOL004829	Glepidotin B	Alpha-1B adrenergic receptor	ADRA1B
MOL004829	Glepidotin B	Estrogen receptor	ESR1
MOL004829	Glepidotin B	Sodium channel protein type 5 subunit alpha	SCN5A
MOL004833	Phaseolinisoflavan	Mitogen-activated protein kinase 14	MAPK14
MOL004833	Phaseolinisoflavan	Nitric oxide synthase, inducible	NOS2
MOL004833	Phaseolinisoflavan	Alpha-1B adrenergic receptor	ADRA1B
MOL004833	Phaseolinisoflavan	Estrogen receptor	ESR1
MOL004833	Phaseolinisoflavan	Beta-2 adrenergic receptor	ADRB2
MOL004833	Phaseolinisoflavan	Acetylcholinesterase	ACHE
MOL004833	Phaseolinisoflavan	Glycogen synthase kinase-3 beta	GSK3B
MOL004833	Phaseolinisoflavan	Peroxisome proliferator activated receptor gamma	PPARG
MOL004833	Phaseolinisoflavan	Sodium channel protein type 5 subunit alpha	SCN5A
MOL004835	Glypallichalcone	Mitogen-activated protein kinase 14	MAPK14
MOL004835	Glypallichalcone	Nitric oxide synthase, inducible	NOS2
MOL004835	Glypallichalcone	Alpha-1B adrenergic receptor	ADRA1B
MOL004835	Glypallichalcone	Amine oxidase [flavin-containing] B	MAOB
MOL004835	Glypallichalcone	Estrogen receptor	ESR1
MOL004835	Glypallichalcone	Beta-2 adrenergic receptor	ADRB2
MOL004835	Glypallichalcone	Glycogen synthase kinase-3 beta	GSK3B
MOL004835	Glypallichalcone	Peroxisome proliferator activated receptor gamma	PPARG
MOL004835	Glypallichalcone	Sodium channel protein type 5 subunit alpha	SCN5A
MOL004835	Glypallichalcone	Sodium-dependent dopamine transporter	SLC6A3
MOL004838	8-(6-hydroxy-2-benzofuranyl)-2,2-dimethyl-5-chromenol	Nitric oxide synthase, inducible	NOS2
MOL004838	8-(6-hydroxy-2-benzofuranyl)-2,2-dimethyl-5-chromenol	Phosphatidylinositol-4,5-bisphosphate 3-kinase catalytic subunit, gamma isoform	PIK3CG
MOL004848	licochalcone G	Mitogen-activated protein kinase 14	MAPK14
MOL004848	licochalcone G	Nitric oxide synthase, inducible	NOS2
MOL004848	licochalcone G	Estrogen receptor	ESR1
MOL004848	licochalcone G	Glycogen synthase kinase-3 beta	GSK3B
MOL004848	licochalcone G	Peroxisome proliferator activated receptor gamma	PPARG
MOL004849	3-(2,4-dihydroxyphenyl)-8-(1,1-dimethylprop-2-enyl)-7-hydroxy-5-methoxy-coumarin	Mitogen-activated protein kinase 14	MAPK14
MOL004849	3-(2,4-dihydroxyphenyl)-8-(1,1-dimethylprop-2-enyl)-7-hydroxy-5-methoxy-coumarin	Nitric oxide synthase, inducible	NOS2
MOL004849	3-(2,4-dihydroxyphenyl)-8-(1,1-dimethylprop-2-enyl)-7-hydroxy-5-methoxy-coumarin	Thrombin	F2
MOL004849	3-(2,4-dihydroxyphenyl)-8-(1,1-dimethylprop-2-enyl)-7-hydroxy-5-methoxy-coumarin	Estrogen receptor	ESR1
MOL004849	3-(2,4-dihydroxyphenyl)-8-(1,1-dimethylprop-2-enyl)-7-hydroxy-5-methoxy-coumarin	Glycogen synthase kinase-3 beta	GSK3B
MOL004849	3-(2,4-dihydroxyphenyl)-8-(1,1-dimethylprop-2-enyl)-7-hydroxy-5-methoxy-coumarin	Peroxisome proliferator activated receptor gamma	PPARG
MOL004855	Licoricone	Nitric oxide synthase, inducible	NOS2
MOL004855	Licoricone	Thrombin	F2
MOL004855	Licoricone	Estrogen receptor	ESR1
MOL004855	Licoricone	Peroxisome proliferator activated receptor gamma	PPARG
MOL004856	Gancaonin A	Nitric oxide synthase, inducible	NOS2
MOL004856	Gancaonin A	Thrombin	F2
MOL004856	Gancaonin A	Estrogen receptor	ESR1
MOL004856	Gancaonin A	Acetylcholinesterase	ACHE
MOL004856	Gancaonin A	Glycogen synthase kinase-3 beta	GSK3B
MOL004856	Gancaonin A	Peroxisome proliferator activated receptor gamma	PPARG
MOL004856	Gancaonin A	Sodium channel protein type 5 subunit alpha	SCN5A
MOL004857	Gancaonin B	Nitric oxide synthase, inducible	NOS2
MOL004857	Gancaonin B	Alpha-1B adrenergic receptor	ADRA1B
MOL004857	Gancaonin B	Thrombin	F2
MOL004857	Gancaonin B	Estrogen receptor	ESR1
MOL004857	Gancaonin B	Beta-2 adrenergic receptor	ADRB2
MOL004857	Gancaonin B	Glycogen synthase kinase-3 beta	GSK3B
MOL004857	Gancaonin B	Peroxisome proliferator activated receptor gamma	PPARG
MOL004863	3-(3,4-dihydroxyphenyl)-5,7-dihydroxy-8-(3-methylbut-2-enyl)chromone	Mitogen-activated protein kinase 14	MAPK14
MOL004863	3-(3,4-dihydroxyphenyl)-5,7-dihydroxy-8-(3-methylbut-2-enyl)chromone	Nitric oxide synthase, inducible	NOS2
MOL004863	3-(3,4-dihydroxyphenyl)-5,7-dihydroxy-8-(3-methylbut-2-enyl)chromone	Thrombin	F2
MOL004863	3-(3,4-dihydroxyphenyl)-5,7-dihydroxy-8-(3-methylbut-2-enyl)chromone	Estrogen receptor	ESR1
MOL004863	3-(3,4-dihydroxyphenyl)-5,7-dihydroxy-8-(3-methylbut-2-enyl)chromone	Glycogen synthase kinase-3 beta	GSK3B
MOL004863	3-(3,4-dihydroxyphenyl)-5,7-dihydroxy-8-(3-methylbut-2-enyl)chromone	Peroxisome proliferator activated receptor gamma	PPARG
MOL004864	5,7-dihydroxy-3-(4-methoxyphenyl)-8-(3-methylbut-2-enyl)chromone	Mitogen-activated protein kinase 14	MAPK14
MOL004864	5,7-dihydroxy-3-(4-methoxyphenyl)-8-(3-methylbut-2-enyl)chromone	Nitric oxide synthase, inducible	NOS2
MOL004864	5,7-dihydroxy-3-(4-methoxyphenyl)-8-(3-methylbut-2-enyl)chromone	Estrogen receptor	ESR1
MOL004864	5,7-dihydroxy-3-(4-methoxyphenyl)-8-(3-methylbut-2-enyl)chromone	Glycogen synthase kinase-3 beta	GSK3B
MOL004864	5,7-dihydroxy-3-(4-methoxyphenyl)-8-(3-methylbut-2-enyl)chromone	Peroxisome proliferator activated receptor gamma	PPARG
MOL004866	2-(3,4-dihydroxyphenyl)-5,7-dihydroxy-6-(3-methylbut-2-enyl)chromone	Thrombin	F2
MOL004866	2-(3,4-dihydroxyphenyl)-5,7-dihydroxy-6-(3-methylbut-2-enyl)chromone	Beta-2 adrenergic receptor	ADRB2
MOL004866	2-(3,4-dihydroxyphenyl)-5,7-dihydroxy-6-(3-methylbut-2-enyl)chromone	Peroxisome proliferator activated receptor gamma	PPARG
MOL004866	2-(3,4-dihydroxyphenyl)-5,7-dihydroxy-6-(3-methylbut-2-enyl)chromone	Sodium channel protein type 5 subunit alpha	SCN5A
MOL004879	Glycyrin	Nitric oxide synthase, inducible	NOS2
MOL004879	Glycyrin	Thrombin	F2
MOL004879	Glycyrin	Estrogen receptor	ESR1
MOL004879	Glycyrin	Peroxisome proliferator activated receptor gamma	PPARG
MOL004882	Licocoumarone	Estrogen receptor	ESR1
MOL004882	Licocoumarone	Glycogen synthase kinase-3 beta	GSK3B
MOL004883	Licoisoflavone	Mitogen-activated protein kinase 14	MAPK14
MOL004883	Licoisoflavone	Nitric oxide synthase, inducible	NOS2
MOL004883	Licoisoflavone	Thrombin	F2
MOL004883	Licoisoflavone	Estrogen receptor	ESR1
MOL004883	Licoisoflavone	Peroxisome proliferator activated receptor gamma	PPARG
MOL004884	Licoisoflavone B	Nitric oxide synthase, inducible	NOS2
MOL004884	Licoisoflavone B	Thrombin	F2
MOL004884	Licoisoflavone B	Estrogen receptor	ESR1
MOL004884	Licoisoflavone B	Acetylcholinesterase	ACHE
MOL004884	Licoisoflavone B	Glycogen synthase kinase-3 beta	GSK3B
MOL004884	Licoisoflavone B	Peroxisome proliferator activated receptor gamma	PPARG
MOL004885	licoisoflavanone	Nitric oxide synthase, inducible	NOS2
MOL004885	licoisoflavanone	Estrogen receptor	ESR1
MOL004885	licoisoflavanone	Acetylcholinesterase	ACHE
MOL004885	licoisoflavanone	Glycogen synthase kinase-3 beta	GSK3B
MOL004885	licoisoflavanone	Peroxisome proliferator activated receptor gamma	PPARG
MOL004885	licoisoflavanone	Sodium channel protein type 5 subunit alpha	SCN5A
MOL004891	shinpterocarpin	Mitogen-activated protein kinase 14	MAPK14
MOL004891	shinpterocarpin	Nitric oxide synthase, inducible	NOS2
MOL004891	shinpterocarpin	Alpha-1B adrenergic receptor	ADRA1B
MOL004891	shinpterocarpin	Phosphatidylinositol-4,5-bisphosphate 3-kinase catalytic subunit, gamma isoform	PIK3CG
MOL004891	shinpterocarpin	Estrogen receptor	ESR1
MOL004891	shinpterocarpin	Beta-2 adrenergic receptor	ADRB2
MOL004891	shinpterocarpin	Alpha-1D adrenergic receptor	ADRA1D
MOL004891	shinpterocarpin	5-hydroxytryptamine receptor 3A	HTR3A
MOL004891	shinpterocarpin	Glycogen synthase kinase-3 beta	GSK3B
MOL004891	shinpterocarpin	Peroxisome proliferator activated receptor gamma	PPARG
MOL004891	shinpterocarpin	Sodium channel protein type 5 subunit alpha	SCN5A
MOL004891	shinpterocarpin	Neuronal acetylcholine receptor protein, alpha-7 chain	CHRNA7
MOL004907	Glyzaglabrin	Mitogen-activated protein kinase 14	MAPK14
MOL004907	Glyzaglabrin	Nitric oxide synthase, inducible	NOS2
MOL004907	Glyzaglabrin	Phosphatidylinositol-4,5-bisphosphate 3-kinase catalytic subunit, gamma isoform	PIK3CG
MOL004907	Glyzaglabrin	Estrogen receptor	ESR1
MOL004907	Glyzaglabrin	Glycogen synthase kinase-3 beta	GSK3B
MOL004907	Glyzaglabrin	Peroxisome proliferator activated receptor gamma	PPARG
MOL004908	Glabridin	Mitogen-activated protein kinase 14	MAPK14
MOL004908	Glabridin	Nitric oxide synthase, inducible	NOS2
MOL004908	Glabridin	Alpha-1B adrenergic receptor	ADRA1B
MOL004908	Glabridin	Estrogen receptor	ESR1
MOL004908	Glabridin	Beta-2 adrenergic receptor	ADRB2
MOL004908	Glabridin	Acetylcholinesterase	ACHE
MOL004908	Glabridin	Glycogen synthase kinase-3 beta	GSK3B
MOL004908	Glabridin	Peroxisome proliferator activated receptor gamma	PPARG
MOL004908	Glabridin	Sodium channel protein type 5 subunit alpha	SCN5A
MOL004910	Glabranin	Nitric oxide synthase, inducible	NOS2
MOL004910	Glabranin	Estrogen receptor	ESR1
MOL004910	Glabranin	Sodium channel protein type 5 subunit alpha	SCN5A
MOL004911	Glabrene	Mitogen-activated protein kinase 14	MAPK14
MOL004911	Glabrene	Nitric oxide synthase, inducible	NOS2
MOL004911	Glabrene	Estrogen receptor	ESR1
MOL004911	Glabrene	Beta-2 adrenergic receptor	ADRB2
MOL004911	Glabrene	Glycogen synthase kinase-3 beta	GSK3B
MOL004911	Glabrene	Peroxisome proliferator activated receptor gamma	PPARG
MOL004911	Glabrene	Sodium channel protein type 5 subunit alpha	SCN5A
MOL004912	Glabrone	Mitogen-activated protein kinase 14	MAPK14
MOL004912	Glabrone	Nitric oxide synthase, inducible	NOS2
MOL004912	Glabrone	Thrombin	F2
MOL004912	Glabrone	Estrogen receptor	ESR1
MOL004912	Glabrone	Acetylcholinesterase	ACHE
MOL004912	Glabrone	Glycogen synthase kinase-3 beta	GSK3B
MOL004912	Glabrone	Peroxisome proliferator activated receptor gamma	PPARG
MOL004912	Glabrone	Sodium channel protein type 5 subunit alpha	SCN5A
MOL004913	1,3-dihydroxy-9-methoxy-6-benzofurano[3,2-c]chromenone	Mitogen-activated protein kinase 14	MAPK14
MOL004913	1,3-dihydroxy-9-methoxy-6-benzofurano[3,2-c]chromenone	Estrogen receptor	ESR1
MOL004913	1,3-dihydroxy-9-methoxy-6-benzofurano[3,2-c]chromenone	Glycogen synthase kinase-3 beta	GSK3B
MOL004913	1,3-dihydroxy-9-methoxy-6-benzofurano[3,2-c]chromenone	Peroxisome proliferator activated receptor gamma	PPARG
MOL004915	Eurycarpin A	Mitogen-activated protein kinase 14	MAPK14
MOL004915	Eurycarpin A	Nitric oxide synthase, inducible	NOS2
MOL004915	Eurycarpin A	Thrombin	F2
MOL004915	Eurycarpin A	Estrogen receptor	ESR1
MOL004915	Eurycarpin A	Glycogen synthase kinase-3 beta	GSK3B
MOL004915	Eurycarpin A	Peroxisome proliferator activated receptor gamma	PPARG
MOL004915	Eurycarpin A	Sodium channel protein type 5 subunit alpha	SCN5A
MOL004941	(2R)-7-hydroxy-2-(4-hydroxyphenyl)chroman-4-one	Amine oxidase [flavin-containing] B	MAOB
MOL004941	(2R)-7-hydroxy-2-(4-hydroxyphenyl)chroman-4-one	Phosphatidylinositol-4,5-bisphosphate 3-kinase catalytic subunit, gamma isoform	PIK3CG
MOL004941	(2R)-7-hydroxy-2-(4-hydroxyphenyl)chroman-4-one	Estrogen receptor	ESR1
MOL004941	(2R)-7-hydroxy-2-(4-hydroxyphenyl)chroman-4-one	Beta-2 adrenergic receptor	ADRB2
MOL004941	(2R)-7-hydroxy-2-(4-hydroxyphenyl)chroman-4-one	Gamma-aminobutyric acid receptor subunit alpha-1	GABRA1
MOL004945	(2S)-7-hydroxy-2-(4-hydroxyphenyl)-8-(3-methylbut-2-enyl)chroman-4-one	Nitric oxide synthase, inducible	NOS2
MOL004945	(2S)-7-hydroxy-2-(4-hydroxyphenyl)-8-(3-methylbut-2-enyl)chroman-4-one	Alpha-1B adrenergic receptor	ADRA1B
MOL004945	(2S)-7-hydroxy-2-(4-hydroxyphenyl)-8-(3-methylbut-2-enyl)chroman-4-one	Estrogen receptor	ESR1
MOL004945	(2S)-7-hydroxy-2-(4-hydroxyphenyl)-8-(3-methylbut-2-enyl)chroman-4-one	Beta-2 adrenergic receptor	ADRB2
MOL004945	(2S)-7-hydroxy-2-(4-hydroxyphenyl)-8-(3-methylbut-2-enyl)chroman-4-one	Sodium channel protein type 5 subunit alpha	SCN5A
MOL004948	Isoglycyrol	Nitric oxide synthase, inducible	NOS2
MOL004948	Isoglycyrol	Estrogen receptor	ESR1
MOL004948	Isoglycyrol	Glycogen synthase kinase-3 beta	GSK3B
MOL004957	HMO	Mitogen-activated protein kinase 14	MAPK14
MOL004957	HMO	Nitric oxide synthase, inducible	NOS2
MOL004957	HMO	Amine oxidase [flavin-containing] B	MAOB
MOL004957	HMO	Estrogen receptor	ESR1
MOL004957	HMO	Beta-2 adrenergic receptor	ADRB2
MOL004957	HMO	Glycogen synthase kinase-3 beta	GSK3B
MOL004957	HMO	Peroxisome proliferator activated receptor gamma	PPARG
MOL004957	HMO	Sodium channel protein type 5 subunit alpha	SCN5A
MOL004957	HMO	Sodium-dependent dopamine transporter	SLC6A3
MOL004959	1-Methoxyphaseollidin	Mitogen-activated protein kinase 14	MAPK14
MOL004959	1-Methoxyphaseollidin	Nitric oxide synthase, inducible	NOS2
MOL004959	1-Methoxyphaseollidin	Alpha-1B adrenergic receptor	ADRA1B
MOL004959	1-Methoxyphaseollidin	Thrombin	F2
MOL004959	1-Methoxyphaseollidin	Phosphatidylinositol-4,5-bisphosphate 3-kinase catalytic subunit, gamma isoform	PIK3CG
MOL004959	1-Methoxyphaseollidin	Estrogen receptor	ESR1
MOL004959	1-Methoxyphaseollidin	Beta-2 adrenergic receptor	ADRB2
MOL004959	1-Methoxyphaseollidin	Alpha-1D adrenergic receptor	ADRA1D
MOL004959	1-Methoxyphaseollidin	Glycogen synthase kinase-3 beta	GSK3B
MOL004959	1-Methoxyphaseollidin	Peroxisome proliferator activated receptor gamma	PPARG
MOL004959	1-Methoxyphaseollidin	Sodium channel protein type 5 subunit alpha	SCN5A
MOL004966	3'-Hydroxy-4'-O-Methylglabridin	Mitogen-activated protein kinase 14	MAPK14
MOL004966	3'-Hydroxy-4'-O-Methylglabridin	Nitric oxide synthase, inducible	NOS2
MOL004966	3'-Hydroxy-4'-O-Methylglabridin	Alpha-1B adrenergic receptor	ADRA1B
MOL004966	3'-Hydroxy-4'-O-Methylglabridin	Estrogen receptor	ESR1
MOL004966	3'-Hydroxy-4'-O-Methylglabridin	Beta-2 adrenergic receptor	ADRB2
MOL004966	3'-Hydroxy-4'-O-Methylglabridin	Glycogen synthase kinase-3 beta	GSK3B
MOL004966	3'-Hydroxy-4'-O-Methylglabridin	Peroxisome proliferator activated receptor gamma	PPARG
MOL004966	3'-Hydroxy-4'-O-Methylglabridin	Sodium channel protein type 5 subunit alpha	SCN5A
MOL004974	3'-Methoxyglabridin	Mitogen-activated protein kinase 14	MAPK14
MOL004974	3'-Methoxyglabridin	Nitric oxide synthase, inducible	NOS2
MOL004974	3'-Methoxyglabridin	Alpha-1B adrenergic receptor	ADRA1B
MOL004974	3'-Methoxyglabridin	Estrogen receptor	ESR1
MOL004974	3'-Methoxyglabridin	Beta-2 adrenergic receptor	ADRB2
MOL004974	3'-Methoxyglabridin	Acetylcholinesterase	ACHE
MOL004974	3'-Methoxyglabridin	Peroxisome proliferator activated receptor gamma	PPARG
MOL004974	3'-Methoxyglabridin	Sodium channel protein type 5 subunit alpha	SCN5A
MOL004978	2-[(3R)-8,8-dimethyl-3,4-dihydro-2H-pyrano[6,5-f]chromen-3-yl]-5-methoxyphenol	Calcium-activated potassium channel subunit alpha 1	KCNMA1
MOL004978	2-[(3R)-8,8-dimethyl-3,4-dihydro-2H-pyrano[6,5-f]chromen-3-yl]-5-methoxyphenol	Mitogen-activated protein kinase 14	MAPK14
MOL004978	2-[(3R)-8,8-dimethyl-3,4-dihydro-2H-pyrano[6,5-f]chromen-3-yl]-5-methoxyphenol	Nitric oxide synthase, inducible	NOS2
MOL004978	2-[(3R)-8,8-dimethyl-3,4-dihydro-2H-pyrano[6,5-f]chromen-3-yl]-5-methoxyphenol	Alpha-1B adrenergic receptor	ADRA1B
MOL004978	2-[(3R)-8,8-dimethyl-3,4-dihydro-2H-pyrano[6,5-f]chromen-3-yl]-5-methoxyphenol	Estrogen receptor	ESR1
MOL004978	2-[(3R)-8,8-dimethyl-3,4-dihydro-2H-pyrano[6,5-f]chromen-3-yl]-5-methoxyphenol	Beta-2 adrenergic receptor	ADRB2
MOL004978	2-[(3R)-8,8-dimethyl-3,4-dihydro-2H-pyrano[6,5-f]chromen-3-yl]-5-methoxyphenol	Acetylcholinesterase	ACHE
MOL004978	2-[(3R)-8,8-dimethyl-3,4-dihydro-2H-pyrano[6,5-f]chromen-3-yl]-5-methoxyphenol	Glycogen synthase kinase-3 beta	GSK3B
MOL004978	2-[(3R)-8,8-dimethyl-3,4-dihydro-2H-pyrano[6,5-f]chromen-3-yl]-5-methoxyphenol	Peroxisome proliferator activated receptor gamma	PPARG
MOL004978	2-[(3R)-8,8-dimethyl-3,4-dihydro-2H-pyrano[6,5-f]chromen-3-yl]-5-methoxyphenol	Sodium channel protein type 5 subunit alpha	SCN5A
MOL004978	2-[(3R)-8,8-dimethyl-3,4-dihydro-2H-pyrano[6,5-f]chromen-3-yl]-5-methoxyphenol	Sodium-dependent dopamine transporter	SLC6A3
MOL004980	Inflacoumarin A	Thrombin	F2
MOL004980	Inflacoumarin A	Estrogen receptor	ESR1
MOL004980	Inflacoumarin A	Beta-2 adrenergic receptor	ADRB2
MOL004980	Inflacoumarin A	Peroxisome proliferator activated receptor gamma	PPARG
MOL004980	Inflacoumarin A	Sodium channel protein type 5 subunit alpha	SCN5A
MOL004988	Kanzonol F	Estrogen receptor	ESR1
MOL004989	6-prenylated eriodictyol	Nitric oxide synthase, inducible	NOS2
MOL004989	6-prenylated eriodictyol	Estrogen receptor	ESR1
MOL004989	6-prenylated eriodictyol	Sodium channel protein type 5 subunit alpha	SCN5A
MOL004991	7-Acetoxy-2-methylisoflavone	Mitogen-activated protein kinase 14	MAPK14
MOL004991	7-Acetoxy-2-methylisoflavone	Nitric oxide synthase, inducible	NOS2
MOL004991	7-Acetoxy-2-methylisoflavone	Alpha-1B adrenergic receptor	ADRA1B
MOL004991	7-Acetoxy-2-methylisoflavone	Thrombin	F2
MOL004991	7-Acetoxy-2-methylisoflavone	Estrogen receptor	ESR1
MOL004991	7-Acetoxy-2-methylisoflavone	Beta-2 adrenergic receptor	ADRB2
MOL004991	7-Acetoxy-2-methylisoflavone	Alpha-1D adrenergic receptor	ADRA1D
MOL004991	7-Acetoxy-2-methylisoflavone	Acetylcholinesterase	ACHE
MOL004991	7-Acetoxy-2-methylisoflavone	Glycogen synthase kinase-3 beta	GSK3B
MOL004991	7-Acetoxy-2-methylisoflavone	Peroxisome proliferator activated receptor gamma	PPARG
MOL004991	7-Acetoxy-2-methylisoflavone	Sodium channel protein type 5 subunit alpha	SCN5A
MOL004991	7-Acetoxy-2-methylisoflavone	Gamma-aminobutyric acid receptor subunit alpha-1	GABRA1
MOL005000	Gancaonin G	Mitogen-activated protein kinase 14	MAPK14
MOL005000	Gancaonin G	Nitric oxide synthase, inducible	NOS2
MOL005000	Gancaonin G	Thrombin	F2
MOL005000	Gancaonin G	Estrogen receptor	ESR1
MOL005000	Gancaonin G	Glycogen synthase kinase-3 beta	GSK3B
MOL005000	Gancaonin G	Peroxisome proliferator activated receptor gamma	PPARG
MOL005001	Gancaonin H	Estrogen receptor	ESR1
MOL005003	Licoagrocarpin	Mitogen-activated protein kinase 14	MAPK14
MOL005003	Licoagrocarpin	Nitric oxide synthase, inducible	NOS2
MOL005003	Licoagrocarpin	Alpha-1B adrenergic receptor	ADRA1B
MOL005003	Licoagrocarpin	Thrombin	F2
MOL005003	Licoagrocarpin	Estrogen receptor	ESR1
MOL005003	Licoagrocarpin	Beta-2 adrenergic receptor	ADRB2
MOL005003	Licoagrocarpin	Acetylcholinesterase	ACHE
MOL005003	Licoagrocarpin	Glycogen synthase kinase-3 beta	GSK3B
MOL005003	Licoagrocarpin	Peroxisome proliferator activated receptor gamma	PPARG
MOL005003	Licoagrocarpin	Sodium channel protein type 5 subunit alpha	SCN5A
MOL005007	Glyasperins M	Nitric oxide synthase, inducible	NOS2
MOL005007	Glyasperins M	Estrogen receptor	ESR1
MOL005007	Glyasperins M	Acetylcholinesterase	ACHE
MOL005007	Glyasperins M	Glycogen synthase kinase-3 beta	GSK3B
MOL005007	Glyasperins M	Peroxisome proliferator activated receptor gamma	PPARG
MOL005007	Glyasperins M	Sodium channel protein type 5 subunit alpha	SCN5A
MOL005012	Licoagroisoflavone	Mitogen-activated protein kinase 14	MAPK14
MOL005012	Licoagroisoflavone	Nitric oxide synthase, inducible	NOS2
MOL005012	Licoagroisoflavone	Thrombin	F2
MOL005012	Licoagroisoflavone	Estrogen receptor	ESR1
MOL005012	Licoagroisoflavone	Glycogen synthase kinase-3 beta	GSK3B
MOL005012	Licoagroisoflavone	Peroxisome proliferator activated receptor gamma	PPARG
MOL005012	Licoagroisoflavone	Sodium channel protein type 5 subunit alpha	SCN5A
MOL005016	Odoratin	Mitogen-activated protein kinase 14	MAPK14
MOL005016	Odoratin	Nitric oxide synthase, inducible	NOS2
MOL005016	Odoratin	Estrogen receptor	ESR1
MOL005016	Odoratin	Glycogen synthase kinase-3 beta	GSK3B
MOL005016	Odoratin	Peroxisome proliferator activated receptor gamma	PPARG
MOL005016	Odoratin	Sodium channel protein type 5 subunit alpha	SCN5A
MOL005017	Phaseol	Mitogen-activated protein kinase 14	MAPK14
MOL005017	Phaseol	Thrombin	F2
MOL005017	Phaseol	Estrogen receptor	ESR1
MOL005017	Phaseol	Glycogen synthase kinase-3 beta	GSK3B
MOL005017	Phaseol	Peroxisome proliferator activated receptor gamma	PPARG
MOL005018	Xambioona	Nitric oxide synthase, inducible	NOS2
MOL005018	Xambioona	Estrogen receptor	ESR1
MOL005020	dehydroglyasperins C	Mitogen-activated protein kinase 14	MAPK14
MOL005020	dehydroglyasperins C	Nitric oxide synthase, inducible	NOS2
MOL005020	dehydroglyasperins C	Estrogen receptor	ESR1
MOL005020	dehydroglyasperins C	Beta-2 adrenergic receptor	ADRB2
MOL005020	dehydroglyasperins C	Peroxisome proliferator activated receptor gamma	PPARG
MOL005020	dehydroglyasperins C	Sodium channel protein type 5 subunit alpha	SCN5A

## Sheet: Codonopsis pilosula
MOL000449	Stigmasterol	Beta-1 adrenergic receptor	ADRB1
MOL000449	Stigmasterol	Alpha-1B adrenergic receptor	ADRA1B
MOL000449	Stigmasterol	Amine oxidase [flavin-containing] B	MAOB
MOL000449	Stigmasterol	Alcohol dehydrogenase 1C	ADH1C
MOL000449	Stigmasterol	Amine oxidase [flavin-containing] A	MAOA
MOL000449	Stigmasterol	Alpha-2A adrenergic receptor	ADRA2A
MOL000449	Stigmasterol	Beta-2 adrenergic receptor	ADRB2
MOL000449	Stigmasterol	Sodium channel protein type 5 subunit alpha	SCN5A
MOL000449	Stigmasterol	Gamma-aminobutyric acid receptor subunit alpha-1	GABRA1
MOL000449	Stigmasterol	Alpha-1A adrenergic receptor	ADRA1A
MOL000449	Stigmasterol	Sodium-dependent dopamine transporter	SLC6A3
MOL000449	Stigmasterol	Neuronal acetylcholine receptor protein, alpha-7 chain	CHRNA7
MOL002140	Perlolyrine	Thrombin	F2
MOL002879	Diop	Beta-2 adrenergic receptor	ADRB2
MOL002879	Diop	Sodium channel protein type 5 subunit alpha	SCN5A
MOL003896	7-Methoxy-2-methyl isoflavone	Mitogen-activated protein kinase 14	MAPK14
MOL003896	7-Methoxy-2-methyl isoflavone	Beta-1 adrenergic receptor	ADRB1
MOL003896	7-Methoxy-2-methyl isoflavone	Nitric oxide synthase, inducible	NOS2
MOL003896	7-Methoxy-2-methyl isoflavone	Alpha-1B adrenergic receptor	ADRA1B
MOL003896	7-Methoxy-2-methyl isoflavone	Amine oxidase [flavin-containing] B	MAOB
MOL003896	7-Methoxy-2-methyl isoflavone	Thrombin	F2
MOL003896	7-Methoxy-2-methyl isoflavone	Estrogen receptor	ESR1
MOL003896	7-Methoxy-2-methyl isoflavone	Beta-2 adrenergic receptor	ADRB2
MOL003896	7-Methoxy-2-methyl isoflavone	Alpha-1D adrenergic receptor	ADRA1D
MOL003896	7-Methoxy-2-methyl isoflavone	Acetylcholinesterase	ACHE
MOL003896	7-Methoxy-2-methyl isoflavone	Glycogen synthase kinase-3 beta	GSK3B
MOL003896	7-Methoxy-2-methyl isoflavone	Peroxisome proliferator activated receptor gamma	PPARG
MOL003896	7-Methoxy-2-methyl isoflavone	Sodium channel protein type 5 subunit alpha	SCN5A
MOL003896	7-Methoxy-2-methyl isoflavone	Gamma-aminobutyric acid receptor subunit alpha-1	GABRA1
MOL003896	7-Methoxy-2-methyl isoflavone	Sodium-dependent dopamine transporter	SLC6A3
MOL003896	7-Methoxy-2-methyl isoflavone	Neuronal acetylcholine receptor protein, alpha-7 chain	CHRNA7
MOL003896	7-Methoxy-2-methyl isoflavone	Dopamine D1 receptor	DRD1
MOL005321	Frutinone A	Thrombin	F2
MOL005321	Frutinone A	Phosphatidylinositol-4,5-bisphosphate 3-kinase catalytic subunit, gamma isoform	PIK3CG
MOL005321	Frutinone A	Beta-2 adrenergic receptor	ADRB2
MOL005321	Frutinone A	Acetylcholinesterase	ACHE
MOL005321	Frutinone A	Peroxisome proliferator activated receptor gamma	PPARG
MOL005321	Frutinone A	Sodium channel protein type 5 subunit alpha	SCN5A
MOL005321	Frutinone A	Gamma-aminobutyric acid receptor subunit alpha-1	GABRA1
MOL005321	Frutinone A	Neuronal acetylcholine receptor protein, alpha-7 chain	CHRNA7
MOL008400	glycitein	Mitogen-activated protein kinase 14	MAPK14
MOL008400	glycitein	Nitric oxide synthase, inducible	NOS2
MOL008400	glycitein	Estrogen receptor	ESR1
MOL008400	glycitein	Glycogen synthase kinase-3 beta	GSK3B
MOL008400	glycitein	Peroxisome proliferator activated receptor gamma	PPARG
MOL008400	glycitein	Amyloid beta A4 protein	APP
MOL008411	11-Hydroxyrankinidine	Estrogen receptor	ESR1
MOL008411	11-Hydroxyrankinidine	Sodium channel protein type 5 subunit alpha	SCN5A

## Sheet: Atractylodes macrocephala Koidz
MOL000049	3β-acetoxyatractylone	Thrombin	F2
MOL000049	3β-acetoxyatractylone	Beta-2 adrenergic receptor	ADRB2
MOL000049	3β-acetoxyatractylone	Acetylcholinesterase	ACHE
MOL000049	3β-acetoxyatractylone	Sodium channel protein type 5 subunit alpha	SCN5A
MOL000049	3β-acetoxyatractylone	Gamma-aminobutyric acid receptor subunit alpha-1	GABRA1
MOL000049	3β-acetoxyatractylone	Alpha-1A adrenergic receptor	ADRA1A
MOL000049	3β-acetoxyatractylone	Neuronal acetylcholine receptor protein, alpha-7 chain	CHRNA7
MOL000072	8β-ethoxy atractylenolide Ⅲ	Gamma-aminobutyric acid receptor subunit alpha-1	GABRA1
MOL000072	8β-ethoxy atractylenolide Ⅲ	Neuronal acetylcholine receptor protein, alpha-7 chain	CHRNA7

## Sheet: Angelica sinensis
MOL000358	beta-sitosterol	Alpha-1B adrenergic receptor	ADRA1B
MOL000358	beta-sitosterol	Phosphatidylinositol-4,5-bisphosphate 3-kinase catalytic subunit, gamma isoform	PIK3CG
MOL000358	beta-sitosterol	Gamma-aminobutyric-acid receptor alpha-2 subunit	GABRA2
MOL000358	beta-sitosterol	Beta-2 adrenergic receptor	ADRB2
MOL000358	beta-sitosterol	Transcription factor AP-1	JUN
MOL000358	beta-sitosterol	Apoptosis regulator BAX	BAX
MOL000358	beta-sitosterol	Sodium channel protein type 5 subunit alpha	SCN5A
MOL000358	beta-sitosterol	Gamma-aminobutyric acid receptor subunit alpha-1	GABRA1
MOL000358	beta-sitosterol	Alpha-1A adrenergic receptor	ADRA1A
MOL000358	beta-sitosterol	Neuronal acetylcholine receptor subunit alpha-2	CHRNA2
MOL000358	beta-sitosterol	Neuronal acetylcholine receptor protein, alpha-7 chain	CHRNA7
MOL000358	beta-sitosterol	Dopamine D1 receptor	DRD1
MOL000449	Stigmasterol	Beta-1 adrenergic receptor	ADRB1
MOL000449	Stigmasterol	Alpha-1B adrenergic receptor	ADRA1B
MOL000449	Stigmasterol	Amine oxidase [flavin-containing] B	MAOB
MOL000449	Stigmasterol	Alcohol dehydrogenase 1C	ADH1C
MOL000449	Stigmasterol	Amine oxidase [flavin-containing] A	MAOA
MOL000449	Stigmasterol	Alpha-2A adrenergic receptor	ADRA2A
MOL000449	Stigmasterol	Beta-2 adrenergic receptor	ADRB2
MOL000449	Stigmasterol	Sodium channel protein type 5 subunit alpha	SCN5A
MOL000449	Stigmasterol	Gamma-aminobutyric acid receptor subunit alpha-1	GABRA1
MOL000449	Stigmasterol	Alpha-1A adrenergic receptor	ADRA1A
MOL000449	Stigmasterol	Sodium-dependent dopamine transporter	SLC6A3
MOL000449	Stigmasterol	Neuronal acetylcholine receptor protein, alpha-7 chain	CHRNA7

## Sheet: Astragalus membranaceus
MOL000371	3,9-di-O-methylnissolin	Alpha-2C adrenergic receptor	ADRA2C
MOL000371	3,9-di-O-methylnissolin	Beta-1 adrenergic receptor	ADRB1
MOL000371	3,9-di-O-methylnissolin	Nitric oxide synthase, inducible	NOS2
MOL000371	3,9-di-O-methylnissolin	Alpha-1B adrenergic receptor	ADRA1B
MOL000371	3,9-di-O-methylnissolin	Thrombin	F2
MOL000371	3,9-di-O-methylnissolin	Estrogen receptor	ESR1
MOL000371	3,9-di-O-methylnissolin	Beta-2 adrenergic receptor	ADRB2
MOL000371	3,9-di-O-methylnissolin	Alpha-1D adrenergic receptor	ADRA1D
MOL000371	3,9-di-O-methylnissolin	5-hydroxytryptamine receptor 3A	HTR3A
MOL000371	3,9-di-O-methylnissolin	Acetylcholinesterase	ACHE
MOL000371	3,9-di-O-methylnissolin	Sodium channel protein type 5 subunit alpha	SCN5A
MOL000371	3,9-di-O-methylnissolin	Gamma-aminobutyric acid receptor subunit alpha-1	GABRA1
MOL000378	7-O-methylisomucronulatol	Alpha-2C adrenergic receptor	ADRA2C
MOL000378	7-O-methylisomucronulatol	Mitogen-activated protein kinase 14	MAPK14
MOL000378	7-O-methylisomucronulatol	Beta-1 adrenergic receptor	ADRB1
MOL000378	7-O-methylisomucronulatol	Nitric oxide synthase, inducible	NOS2
MOL000378	7-O-methylisomucronulatol	Alpha-1B adrenergic receptor	ADRA1B
MOL000378	7-O-methylisomucronulatol	Thrombin	F2
MOL000378	7-O-methylisomucronulatol	Estrogen receptor	ESR1
MOL000378	7-O-methylisomucronulatol	Beta-2 adrenergic receptor	ADRB2
MOL000378	7-O-methylisomucronulatol	Alpha-1D adrenergic receptor	ADRA1D
MOL000378	7-O-methylisomucronulatol	Peroxisome proliferator activated receptor gamma	PPARG
MOL000378	7-O-methylisomucronulatol	Sodium channel protein type 5 subunit alpha	SCN5A
MOL000378	7-O-methylisomucronulatol	Gamma-aminobutyric acid receptor subunit alpha-1	GABRA1
MOL000378	7-O-methylisomucronulatol	Alpha-1A adrenergic receptor	ADRA1A
MOL000378	7-O-methylisomucronulatol	Sodium-dependent dopamine transporter	SLC6A3
MOL000378	7-O-methylisomucronulatol	Dopamine D1 receptor	DRD1
MOL000380	(6aR,11aR)-9,10-dimethoxy-6a,11a-dihydro-6H-benzofurano[3,2-c]chromen-3-ol	Nitric oxide synthase, inducible	NOS2
MOL000380	(6aR,11aR)-9,10-dimethoxy-6a,11a-dihydro-6H-benzofurano[3,2-c]chromen-3-ol	Alpha-1B adrenergic receptor	ADRA1B
MOL000380	(6aR,11aR)-9,10-dimethoxy-6a,11a-dihydro-6H-benzofurano[3,2-c]chromen-3-ol	Thrombin	F2
MOL000380	(6aR,11aR)-9,10-dimethoxy-6a,11a-dihydro-6H-benzofurano[3,2-c]chromen-3-ol	Estrogen receptor	ESR1
MOL000380	(6aR,11aR)-9,10-dimethoxy-6a,11a-dihydro-6H-benzofurano[3,2-c]chromen-3-ol	Beta-2 adrenergic receptor	ADRB2
MOL000380	(6aR,11aR)-9,10-dimethoxy-6a,11a-dihydro-6H-benzofurano[3,2-c]chromen-3-ol	Alpha-1D adrenergic receptor	ADRA1D
MOL000380	(6aR,11aR)-9,10-dimethoxy-6a,11a-dihydro-6H-benzofurano[3,2-c]chromen-3-ol	5-hydroxytryptamine receptor 3A	HTR3A
MOL000380	(6aR,11aR)-9,10-dimethoxy-6a,11a-dihydro-6H-benzofurano[3,2-c]chromen-3-ol	Acetylcholinesterase	ACHE
MOL000380	(6aR,11aR)-9,10-dimethoxy-6a,11a-dihydro-6H-benzofurano[3,2-c]chromen-3-ol	Sodium channel protein type 5 subunit alpha	SCN5A
MOL000380	(6aR,11aR)-9,10-dimethoxy-6a,11a-dihydro-6H-benzofurano[3,2-c]chromen-3-ol	Gamma-aminobutyric acid receptor subunit alpha-1	GABRA1
MOL000380	(6aR,11aR)-9,10-dimethoxy-6a,11a-dihydro-6H-benzofurano[3,2-c]chromen-3-ol	Neuronal acetylcholine receptor protein, alpha-7 chain	CHRNA7

## Sheet: American ginseng
MOL000358	beta-sitosterol	Alpha-1B adrenergic receptor	ADRA1B
MOL000358	beta-sitosterol	Phosphatidylinositol-4,5-bisphosphate 3-kinase catalytic subunit, gamma isoform	PIK3CG
MOL000358	beta-sitosterol	Gamma-aminobutyric-acid receptor alpha-2 subunit	GABRA2
MOL000358	beta-sitosterol	Beta-2 adrenergic receptor	ADRB2
MOL000358	beta-sitosterol	Transcription factor AP-1	JUN
MOL000358	beta-sitosterol	Apoptosis regulator BAX	BAX
MOL000358	beta-sitosterol	Sodium channel protein type 5 subunit alpha	SCN5A
MOL000358	beta-sitosterol	Gamma-aminobutyric acid receptor subunit alpha-1	GABRA1
MOL000358	beta-sitosterol	Alpha-1A adrenergic receptor	ADRA1A
MOL000358	beta-sitosterol	Neuronal acetylcholine receptor subunit alpha-2	CHRNA2
MOL000358	beta-sitosterol	Neuronal acetylcholine receptor protein, alpha-7 chain	CHRNA7
MOL000358	beta-sitosterol	Dopamine D1 receptor	DRD1
MOL004190	(-)-alpha-N-methylcanadine	Alpha-1B adrenergic receptor	ADRA1B
MOL006980	papaverine	Alpha-1B adrenergic receptor	ADRA1B
MOL006980	papaverine	Amine oxidase [flavin-containing] A	MAOA
MOL006980	papaverine	Beta-2 adrenergic receptor	ADRB2
MOL006980	papaverine	Sodium channel protein type 5 subunit alpha	SCN5A
